# Supplementary material for: Beyond standard brewing yeasts: exploring fermentative and aroma diversity in beers produced with commercial non-conventional strains
Source: Research Square preprint supplement (doi:10.21203/rs.3.rs-8603799/v1), 2026-01-29
Supplement: Supplementary file 1 [file 2fea478fbd2987f140a27fa6.docx]

**Supplementary information**

**Comparative Study of Commercial Non-Conventional Yeasts Applied in Beer**

Danae Macarena Romero Rojas1, Clara Bruzone1, Andrea Trochine1, Diego Libkind1, Julieta Amalia Burini1,*

1Centro de Referencia en Levaduras y Tecnología Cervecera (CRELTEC), Instituto Andino Patagónico de Tecnologías Biológicas y Geoambientales (IPATEC), CONICET - Universidad Nacional del Comahue, San Carlos de Bariloche, Argentina.

***Corresponding author**: [juliburini@comahue-conicet.gob.ar](mailto:juliburini@comahue-conicet.gob.ar). Centro de Salmonicultura, Camino Cerro Catedral, Bariloche (8400), Argentina. ORCID 0000-0002-1581-4010

Journal: European Food Research and Technology


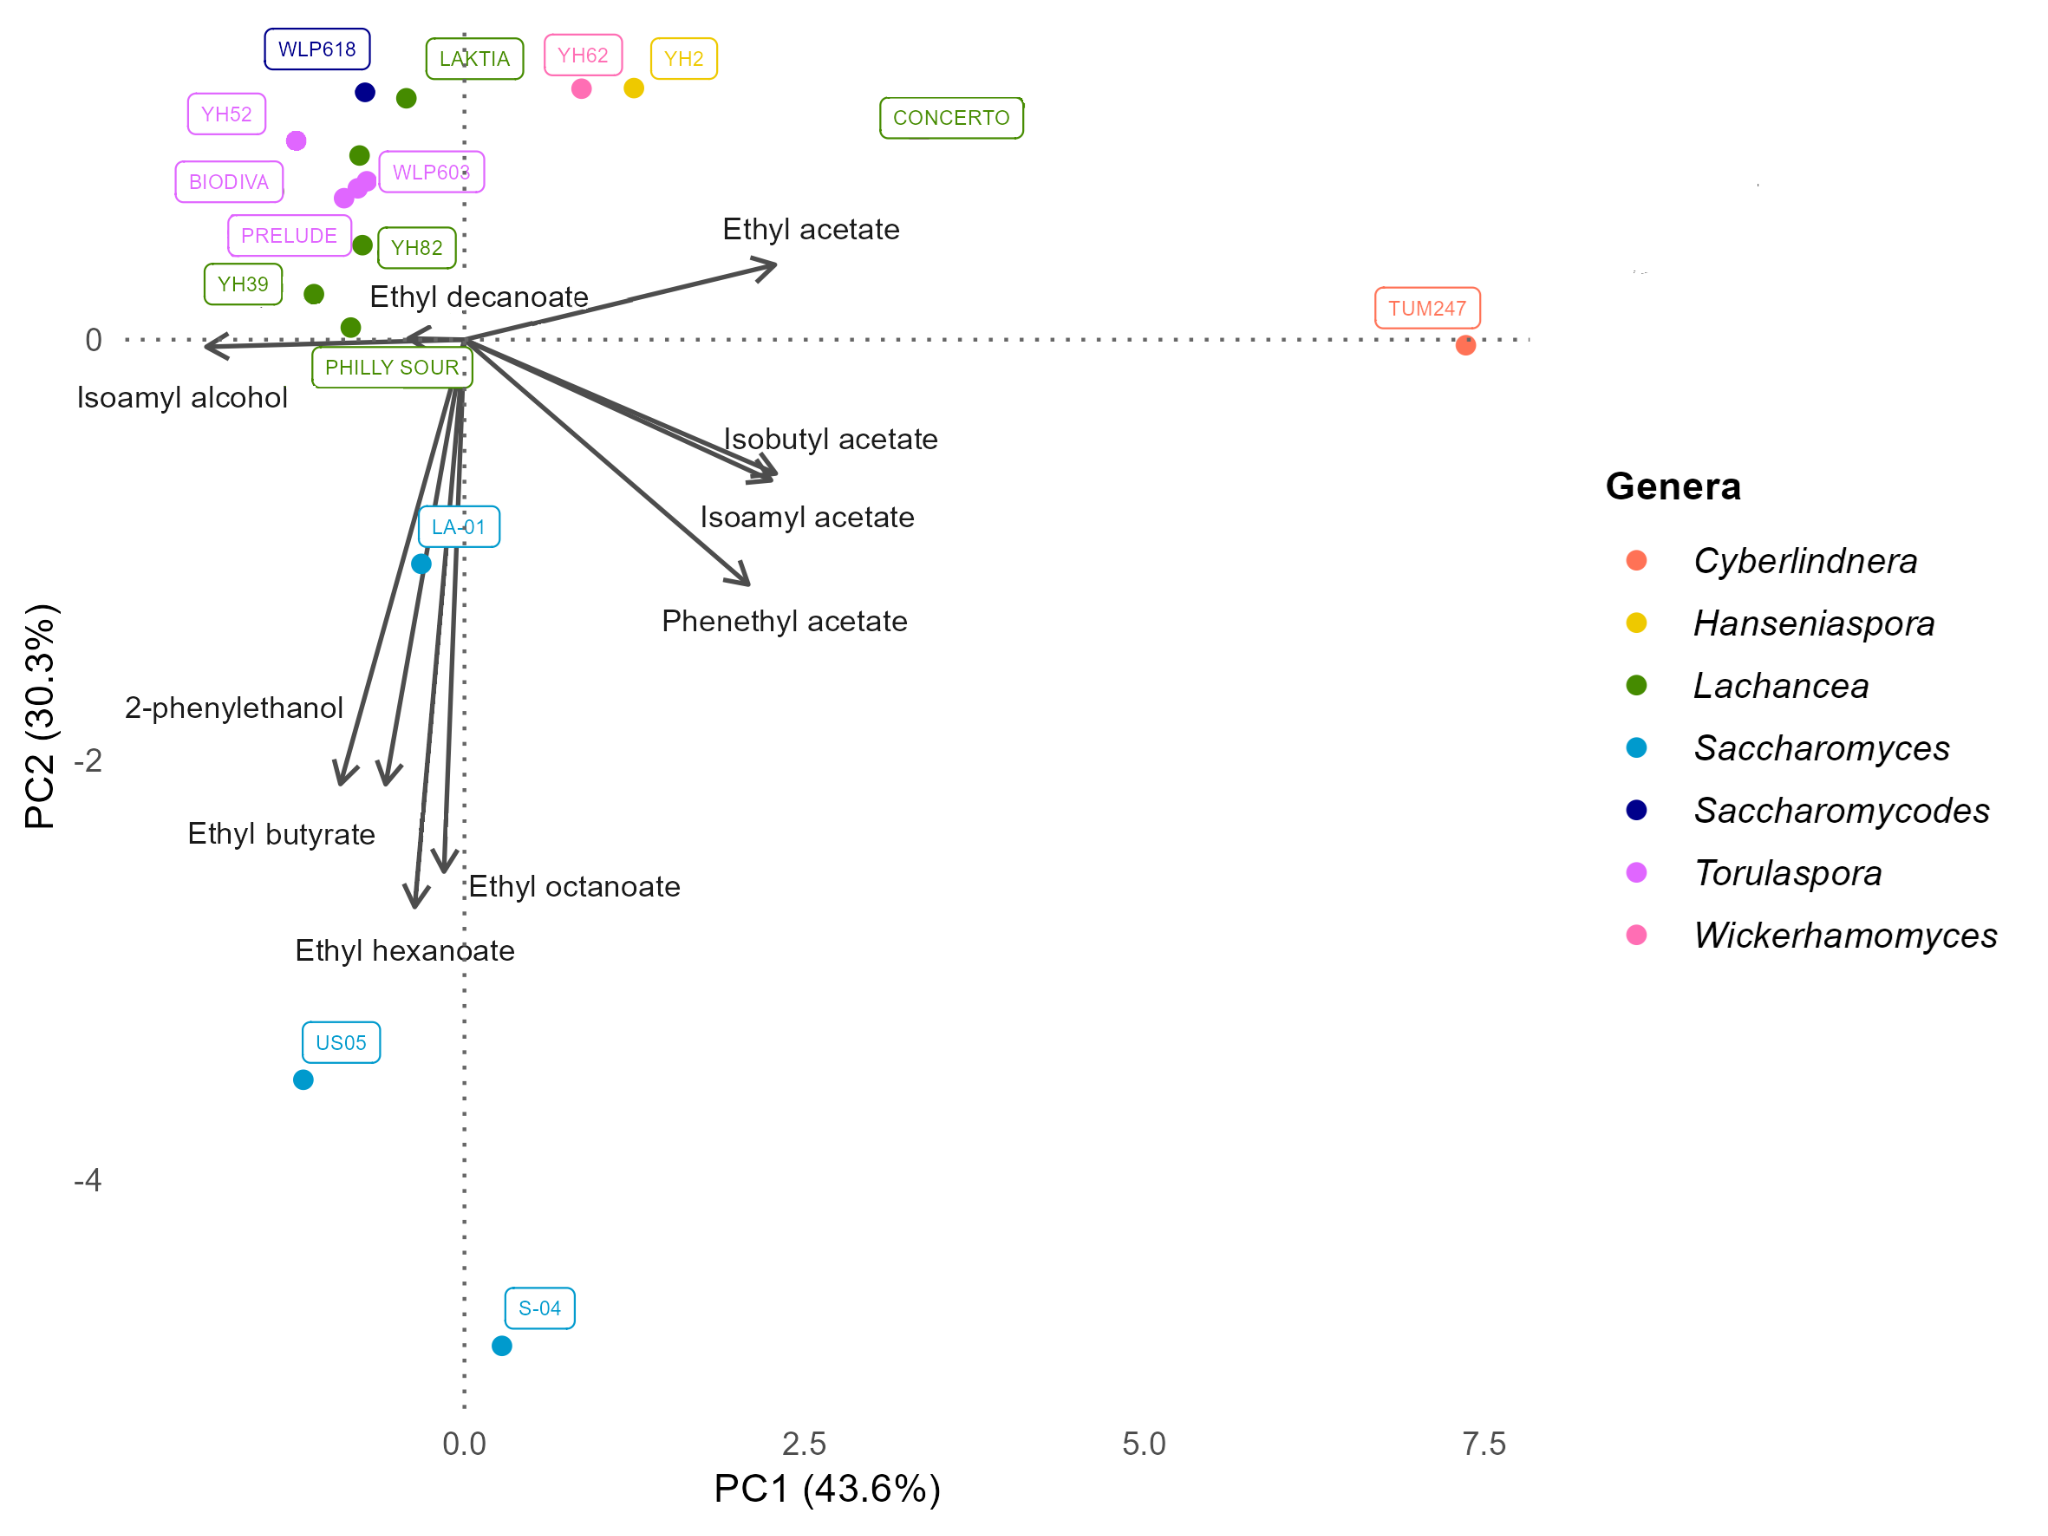


**Fig. S1** Principal component analysis (PCA) of volatile compounds in non-conventional and reference strains
